# Supplementary material
Source: HighWire-hosted journal article supplement (https://bmjopen.bmj.com/content/13/6/e066154)
Supplement: inline-supplementary-material-1 [file inline-supplementary-material-1.pdf]

Appendix A: Dimensions of uncertainty from Lee et al framework incorporated into development of questionnaire items

| Item |                                                                                                                                                                                    | Source of uncertainty                       | Response to uncertainty                                                                                    |
|------|------------------------------------------------------------------------------------------------------------------------------------------------------------------------------------|---------------------------------------------|------------------------------------------------------------------------------------------------------------|
| 1    | Ask another student to demonstrate a clinical skill (e.g., taking blood, examination, history taking) when you are unsure how to do it.                                            | - Knowledge                                 | - Cognitive: Acknowledging uncertainty, recognising learning opportunity<br>- Behavioural: Asking for help |
| 2    | Speaking up in a tutorial when you don't understand something that the tutor has said.                                                                                             | - Knowledge<br>- Relationships<br>- Systems | - Cognitive: Acknowledging uncertainty<br>- Behavioural: Speaking up                                       |
| 3    | Tell a patient that you don't have an answer to their question                                                                                                                     | - Knowledge<br>- Relationships              | - Cognitive: Acknowledging uncertainty<br>- Behavioural: Speaking up                                       |
| 4    | Stop yourself feeling threatened when a senior doctor asks a question that you don't know the answer to.                                                                           | - Knowledge<br>- Relationships<br>- Systems | - Cognitive: Acknowledging uncertainty<br>Emotional: managing emotional response                           |
| 5    | Tell another student that you don't know if you are competent to perform a clinical skill (e.g., taking blood, examination, history taking) which was asked of you on a ward round | - Knowledge<br>- Relationships              | - Cognitive: Acknowledging uncertainty<br>- Behavioural: Taking action to seek support                     |
| 6    | Stop yourself feeling fearful in unfamiliar situations (e.g., new ward, new placement, meeting a patient for the first time).                                                      | - Knowledge<br>- Relationships<br>- Systems | - Emotional: Managing emotional response                                                                   |
| 7    | Tell a ward pharmacist that you don't know why a patient is prescribed a on a particular medication when asked about a drug chart.                                                 | - Knowledge<br>- Relationships              | - Cognitive: Acknowledging uncertainty<br>- Behavioural: Speaking up                                       |
| 8    | Keep calm when you don't know the answer to a question asked by another student.                                                                                                   | - Knowledge<br>- Relationships              | - Cognitive: Acknowledging uncertainty<br>- Emotional: Managing emotional response                         |

|           |                                                                                                                                                                      |                                                                                                           |                                                                                                                                                                                              |
|-----------|----------------------------------------------------------------------------------------------------------------------------------------------------------------------|-----------------------------------------------------------------------------------------------------------|----------------------------------------------------------------------------------------------------------------------------------------------------------------------------------------------|
| <b>9</b>  | Ask a senior doctor to demonstrate a clinical skill (e.g., taking blood, examination, history taking) when you are unsure how to do it.                              | <ul style="list-style-type: none"> <li>- Knowledge</li> <li>- Relationships</li> <li>- Systems</li> </ul> | <ul style="list-style-type: none"> <li>- Cognitive: Acknowledging uncertainty, recognising learning opportunity</li> <li>- Behavioural: Action, seeking help, information seeking</li> </ul> |
| <b>10</b> | Tell another student when you think that the wrong dose of a medication has been prescribed for a patient.                                                           | <ul style="list-style-type: none"> <li>- Knowledge</li> <li>- Relationships</li> </ul>                    | <ul style="list-style-type: none"> <li>- Cognitive: Acknowledging uncertainty</li> <li>- Behavioural: action, seeking guidance, speaking up</li> </ul>                                       |
| <b>11</b> | Ask a pharmacist to clarify how a drug works on the first day of a new placement.                                                                                    | <ul style="list-style-type: none"> <li>- Knowledge</li> <li>- Relationships</li> <li>- Systems</li> </ul> | <ul style="list-style-type: none"> <li>- Cognitive: Acknowledging uncertainty, opportunity for learning</li> <li>- Behavioural: Asking for help, information seeking</li> </ul>              |
| <b>12</b> | Manage feelings of anxiety when practising a clinical skill (e.g., taking blood, examination, history taking) in front of senior doctors.                            | <ul style="list-style-type: none"> <li>- Knowledge</li> <li>- Relationships</li> <li>- Systems</li> </ul> | <ul style="list-style-type: none"> <li>- Cognitive: Acknowledging uncertainty</li> <li>- Emotional: Managing emotional response</li> </ul>                                                   |
| <b>13</b> | Tell a physiotherapist when you don't have an answer to their question                                                                                               | <ul style="list-style-type: none"> <li>- Knowledge</li> <li>- Relationships</li> </ul>                    | <ul style="list-style-type: none"> <li>- Cognitive: Acknowledging uncertainty</li> <li>- Behavioural: Speaking up</li> </ul>                                                                 |
| <b>14</b> | Keep calm when you don't know the answer to a question asked by a patient.                                                                                           | <ul style="list-style-type: none"> <li>- Knowledge</li> <li>- Relationships</li> </ul>                    | <ul style="list-style-type: none"> <li>- Cognitive: Acknowledging uncertainty, vulnerability</li> <li>- Emotional: Managing emotional response</li> </ul>                                    |
| <b>15</b> | Tell a doctor when you don't know if you are competent to perform a clinical skill (e.g., taking blood, examination, history taking) that they have requested of you | <ul style="list-style-type: none"> <li>- Knowledge</li> <li>- Relationships</li> <li>- Systems</li> </ul> | <ul style="list-style-type: none"> <li>- Cognitive: Acknowledging uncertainty and own limits</li> <li>- Behavioural: Speaking up and seeking help</li> </ul>                                 |
| <b>16</b> | Speaking up on a ward round when you don't understand something that has been said by a doctor/nurse.                                                                | <ul style="list-style-type: none"> <li>- Knowledge</li> <li>- Relationships</li> <li>- Systems</li> </ul> | <ul style="list-style-type: none"> <li>- Cognitive: Acknowledging uncertainty, recognising learning opportunity</li> <li>- Behavioural: Speaking up and information seeking</li> </ul>       |
| <b>17</b> | Manage feelings of anxiety when practicing a clinical skill (e.g., taking blood, examination, history taking) in front of other students.                            | <ul style="list-style-type: none"> <li>- Knowledge</li> <li>- Relationships</li> </ul>                    | <ul style="list-style-type: none"> <li>- Cognitive: Acknowledging uncertainty</li> <li>- Emotional: Managing emotional response</li> </ul>                                                   |
| <b>18</b> | Ask a pharmacist to review a prescription when you think that the wrong dose of a medication has been prescribed for a patient.                                      | <ul style="list-style-type: none"> <li>- Knowledge</li> <li>- Relationships</li> <li>- Systems</li> </ul> | <ul style="list-style-type: none"> <li>- Cognitive: Acknowledging uncertainty</li> <li>- Behavioural: Speaking up and asking for help</li> </ul>                                             |

|    |                                                                                                                                      |                                                                                                           |                                                                                                                                                                    |
|----|--------------------------------------------------------------------------------------------------------------------------------------|-----------------------------------------------------------------------------------------------------------|--------------------------------------------------------------------------------------------------------------------------------------------------------------------|
| 19 | Stop yourself from feeling embarrassed if you don't know the answer to a question asked by a senior doctor on a ward round.          | <ul style="list-style-type: none"> <li>- Knowledge</li> <li>- Relationships</li> <li>- Systems</li> </ul> | <ul style="list-style-type: none"> <li>- Cognitive: Acknowledging uncertainty</li> <li>- Emotional: Managing emotional response</li> </ul>                         |
| 20 | Ask another student, who is busy taking a patient history, for help obtaining a blood sample.                                        | <ul style="list-style-type: none"> <li>- Knowledge</li> <li>- Relationships</li> <li>- Systems</li> </ul> | <ul style="list-style-type: none"> <li>- Cognitive: Acknowledging limitations</li> <li>- Behavioural: Asking for help</li> </ul>                                   |
| 21 | Tell a patient that you don't have a diagnosis for their symptoms                                                                    | <ul style="list-style-type: none"> <li>- Knowledge</li> <li>- Relationships</li> </ul>                    | <ul style="list-style-type: none"> <li>- Cognitive: Acknowledging uncertainty</li> <li>- Behavioural: Speaking up</li> </ul>                                       |
| 22 | Ask a nurse for help finding equipment (e.g., a tourniquet), when you are new to a ward.                                             | <ul style="list-style-type: none"> <li>- Knowledge</li> <li>- Relationships</li> <li>- Systems</li> </ul> | <ul style="list-style-type: none"> <li>- Cognitive: Acknowledging uncertainty, recognising learning opportunity</li> <li>- Behavioural: Asking for help</li> </ul> |
| 23 | Keep calm when you don't know the answer to a question asked on a ward round.                                                        | <ul style="list-style-type: none"> <li>- Knowledge</li> <li>- Relationships</li> <li>- Systems</li> </ul> | <ul style="list-style-type: none"> <li>- Cognitive: Acknowledging uncertainty</li> <li>- Emotional: Managing emotional response</li> </ul>                         |
| 24 | Tell a senior doctor when you think that the wrong dose of a medication has been prescribed for a patient.                           | <ul style="list-style-type: none"> <li>- Knowledge</li> <li>- Relationships</li> <li>- Systems</li> </ul> | <ul style="list-style-type: none"> <li>- Cognitive: Acknowledging uncertainty</li> <li>- Behavioural: Speaking up and asking for clarification</li> </ul>          |
| 25 | Ask a patient to explain more about their condition when you have not previously encountered their symptoms.                         | <ul style="list-style-type: none"> <li>- Knowledge</li> <li>- Relationships</li> </ul>                    | <ul style="list-style-type: none"> <li>- Cognitive: Acknowledging uncertainty</li> <li>- Behavioural: Information seeking</li> </ul>                               |
| 26 | Tell a nurse that you do not know if you are competent to take blood from a patient                                                  | <ul style="list-style-type: none"> <li>- Knowledge</li> <li>- Relationships</li> <li>- Systems</li> </ul> | <ul style="list-style-type: none"> <li>- Cognitive: Acknowledging uncertainty</li> <li>- Behavioural: Speaking up</li> </ul>                                       |
| 27 | Stop yourself feeling threatened when a patient asks a question that you don't know the answer to.                                   | <ul style="list-style-type: none"> <li>- Knowledge</li> <li>- Relationships</li> </ul>                    | <ul style="list-style-type: none"> <li>- Cognitive: Acknowledging uncertainty, vulnerability</li> <li>- Emotional: Managing emotional response</li> </ul>          |
| 28 | Ask a doctor, who is busy writing a referral, for help with a patient that is in pain.                                               | <ul style="list-style-type: none"> <li>- Knowledge</li> <li>- Relationships</li> <li>- Systems</li> </ul> | <ul style="list-style-type: none"> <li>- Cognitive: Acknowledging uncertainty</li> <li>- Behavioural: Asking for help</li> </ul>                                   |
| 29 | Manage feelings of anxiety when practicing a clinical skill (e.g., taking blood, examination, history taking) in front of a patient. | <ul style="list-style-type: none"> <li>- Knowledge</li> <li>- Relationships</li> </ul>                    | <ul style="list-style-type: none"> <li>- Cognitive: Acknowledging uncertainty, vulnerability</li> <li>- Emotional: Managing emotional response</li> </ul>          |
