# Supplementary material
Source: HighWire-hosted journal article supplement (https://bmjopen.bmj.com/content/13/6/e066154)
Supplement: inline-supplementary-material-2 [file inline-supplementary-material-2.pdf]

*Appendix B. Frequencies and Percentages of Participant Demographics by Year Level comparing participants to 2019 student cohort*

| Demographic Feature |                     | Year 2              |                            | Year 4              |                            | Year 6              |                            |
|---------------------|---------------------|---------------------|----------------------------|---------------------|----------------------------|---------------------|----------------------------|
|                     |                     | <i>Participants</i> | <i>2019 student cohort</i> | <i>Participants</i> | <i>2019 student cohort</i> | <i>Participants</i> | <i>2019 student cohort</i> |
| Gender              | Female              | 62%                 | 59%                        | 62%                 | 63%                        | 51%                 | 52%                        |
|                     | Male                | 35%                 | 41%                        | 36%                 | 37%                        | 49%                 | 48%                        |
| Entry to Programme  | HSFY                | 69%                 | 71%                        | 70%                 | 69%                        | 73%                 | 71%                        |
|                     | Graduate Entry      | 22%                 | 22%                        | 24%                 | 26%                        | 15%                 | 18%                        |
|                     | Alternative Pathway | 9%                  | 7%                         | 6%                  | 5%                         | 12%                 | 10%                        |
| Ethnicity           | NZ European         | 62%                 | 59%                        | 67%                 | 66%                        | 68%                 | 68%                        |
|                     | Māori               | 17%                 | 19%                        | 18%                 | 21%                        | 16%                 | 14%                        |
|                     | Asian               | 25%                 | 26%                        | 21%                 | 23%                        | 22%                 | 23%                        |
|                     | Other Ethnicity     | 17%                 | 24%                        | 11%                 | 20%                        | 12%                 | 21%                        |

Percentages have been rounded to the nearest one. Ethnicity will total more than 100% because participants can identify with more than one ethnicity.
